# Supplementary material for: Efficient extraction of polystyrene nanoplastics from water using an ionic liquid
Source: Royal Society of Chemistry journal article supplement (doi:10.1039/d4ew00909f), 2025-01-01

## **Supplementary Information**

### **Efficient extraction of polystyrene nano plastics from water via Ionic Liquid**

Ashish Srivastava<sup>1</sup>, Sudhir Ravula<sup>1</sup>, Jason E. Bara<sup>1</sup>, Milad Rabbani Esfahani<sup>1\*</sup>

Department of Chemical and Biological Engineering, The University of Alabama,  
Tuscaloosa, AL 35487-0203, United States.

\*Corresponding Author:

Milad Rabbani Esfahani

[mesfahani@eng.ua.edu](mailto:mesfahani@eng.ua.edu)

Phone# 205-348-8836

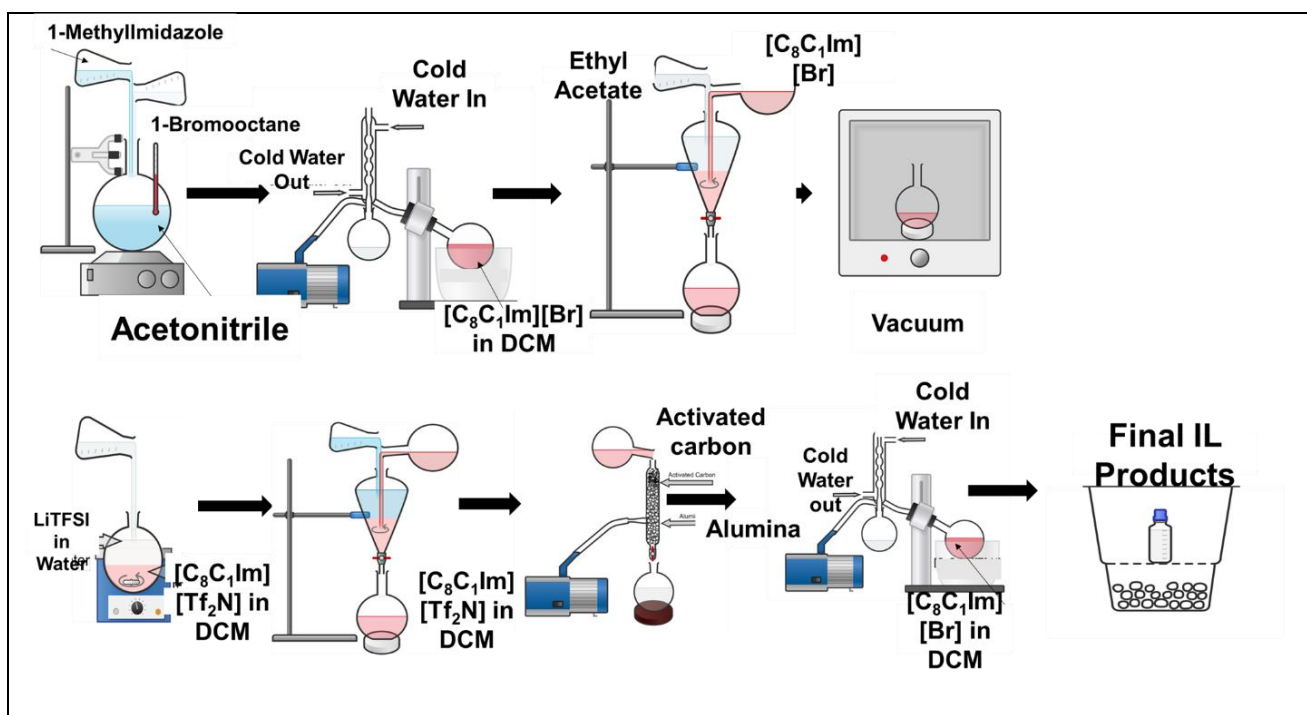

**Figure S1.** The schematic represent the synthesis of the  $[C_8C_1Im][Tf_2N]$  via multistep procedure steps including **1)** The reaction of 1-bromooctane with 1-methylimidazole at  $80^\circ C$  for 48 h **2)** the Concentrating process at 10 torr for complete removal of acetonitrile, **3)** A liquid-liquid extraction procedure with ethyl acetate serving as the extracting solvent, **4)** The organic phase subjected to vacuum drying to effectively remove residual solvents, **5)** Initiation of the metathesis reaction by introducing lithium bistriflimide ( $LiTf_2N$ ), **6)** The organic solution containing dichloromethane (DCM) undergoing a series of water washes, for ten times, **7)** Purification to remove impurities by activated carbon and then with alumina bed column; **8)** A concentration process ensuring the removal of any remaining solvent trace.

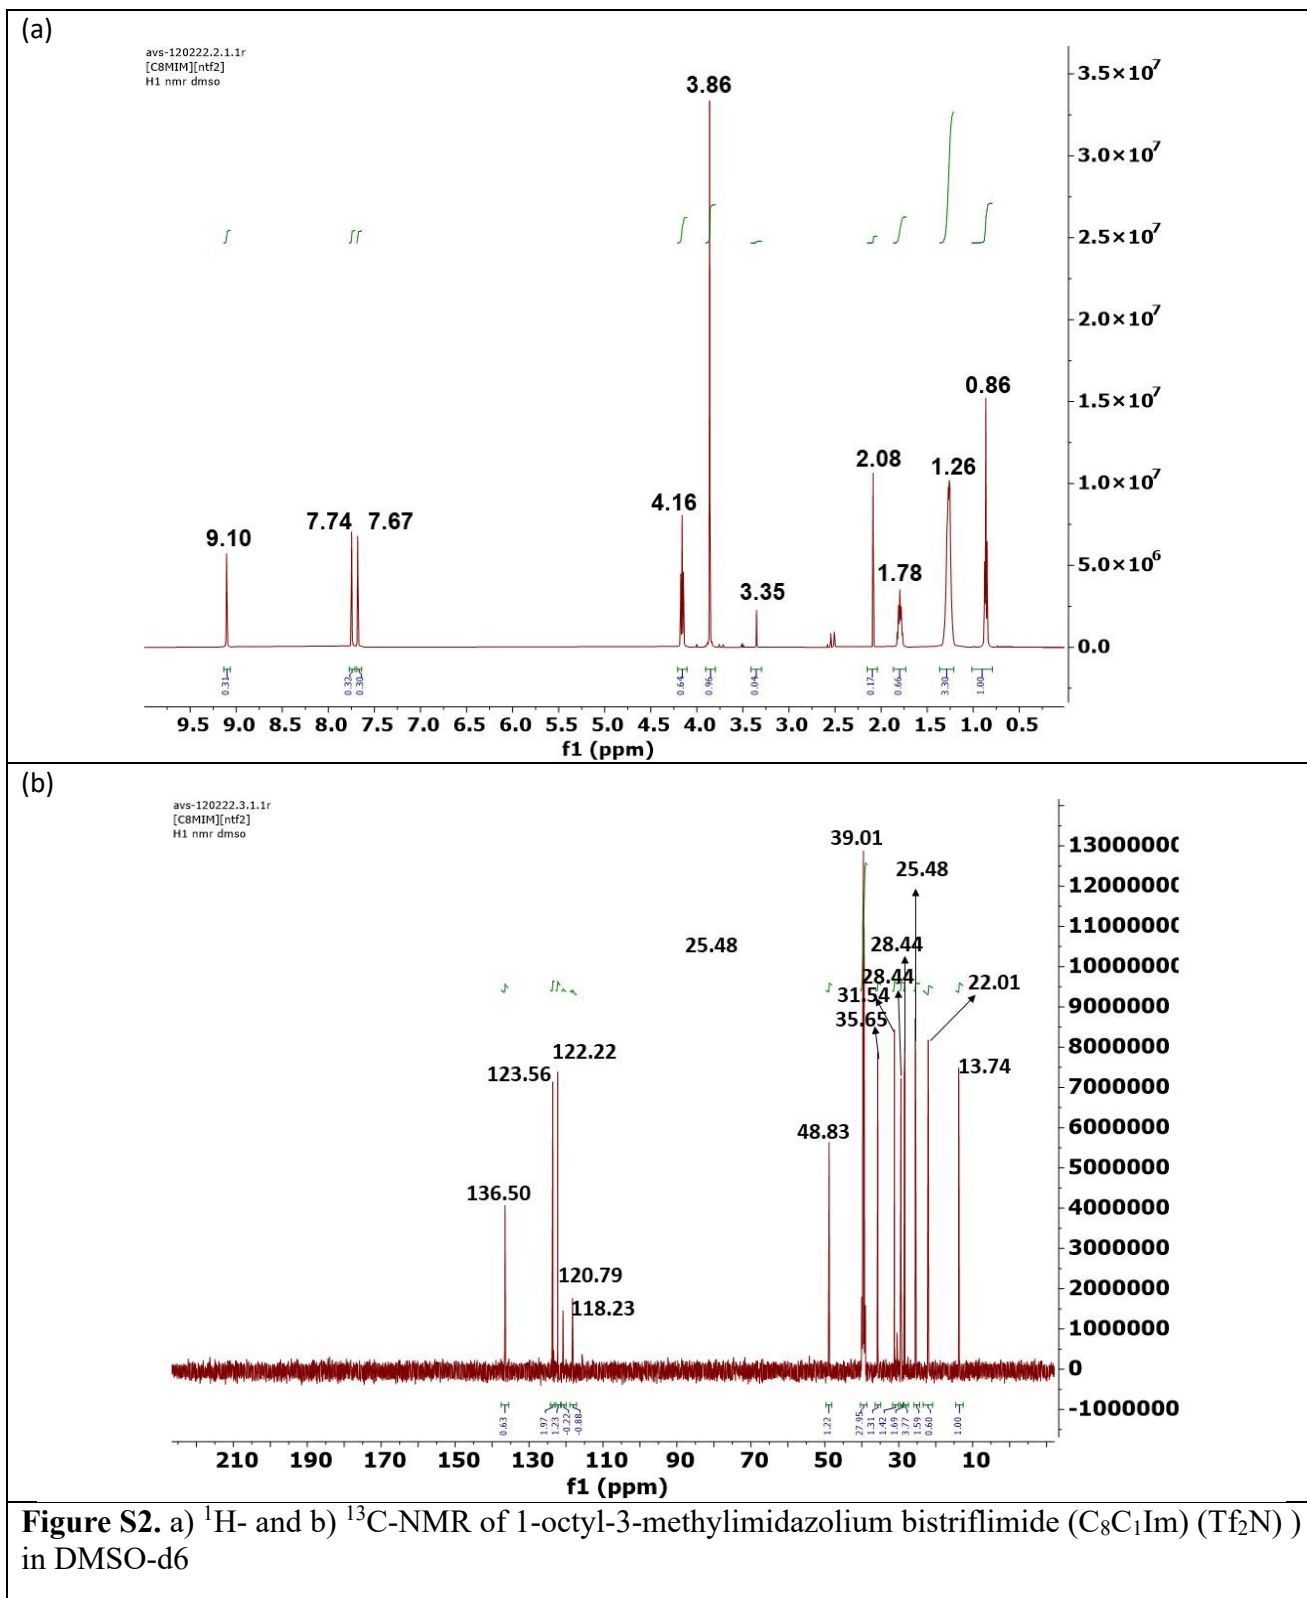

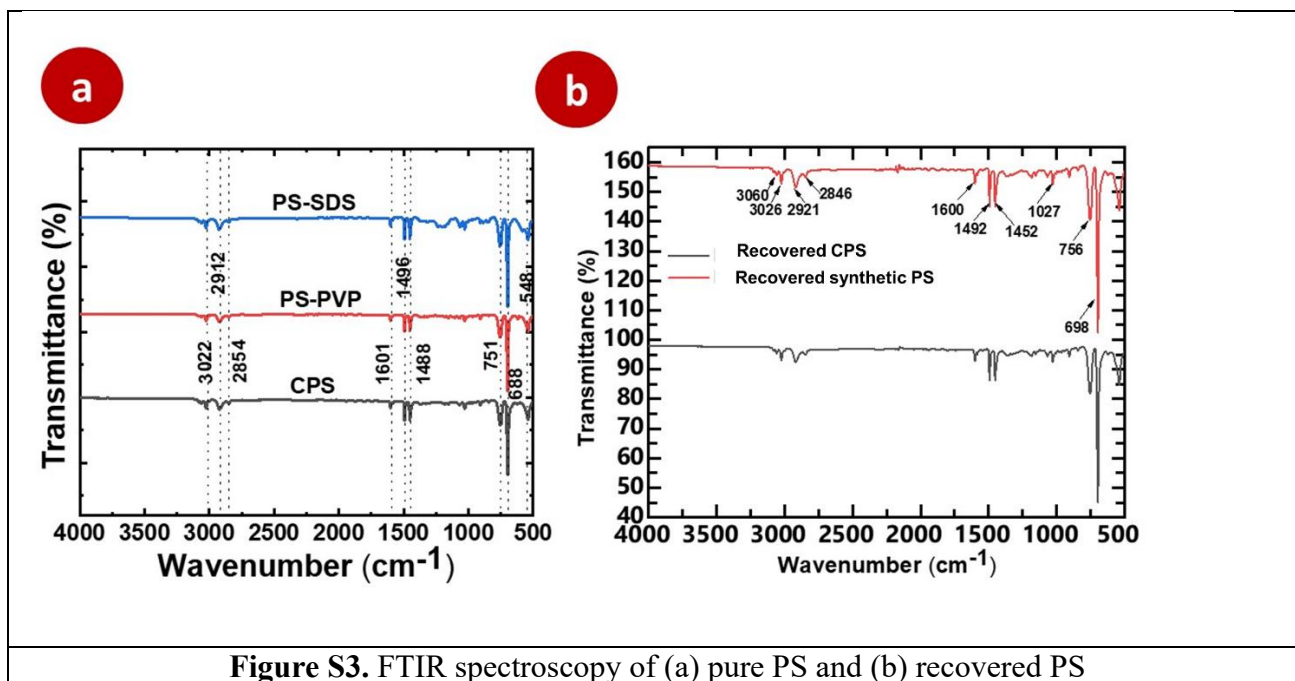

**Figure S3.** FTIR spectroscopy of (a) pure PS and (b) recovered PS

**Table S1.** Total Organic Carbon (TOC) and conductivity of Lake Tuscaloosa water changes with the addition of [C<sub>8</sub>C<sub>1</sub>Im] [Tf<sub>2</sub>N]

|                                 | Conductivity<br>(before extraction) | Conductivity<br>(after extraction) | TOC after extraction<br>(ppm) |
|---------------------------------|-------------------------------------|------------------------------------|-------------------------------|
| DI water                        | 2.71                                | -                                  |                               |
| Lake Tuscaloosa<br>water sample | 65.01                               | -                                  | 3.40±0.99                     |
| CPS                             | 68.41                               | 153.1                              | 3.99 ± 0.14                   |
| PS-SDS                          | 223.1                               | 267.3                              | 3.56 ± 0.63                   |
| PS-PVP                          | 68.79                               | 223.1                              | 3.40 ± 0.58                   |

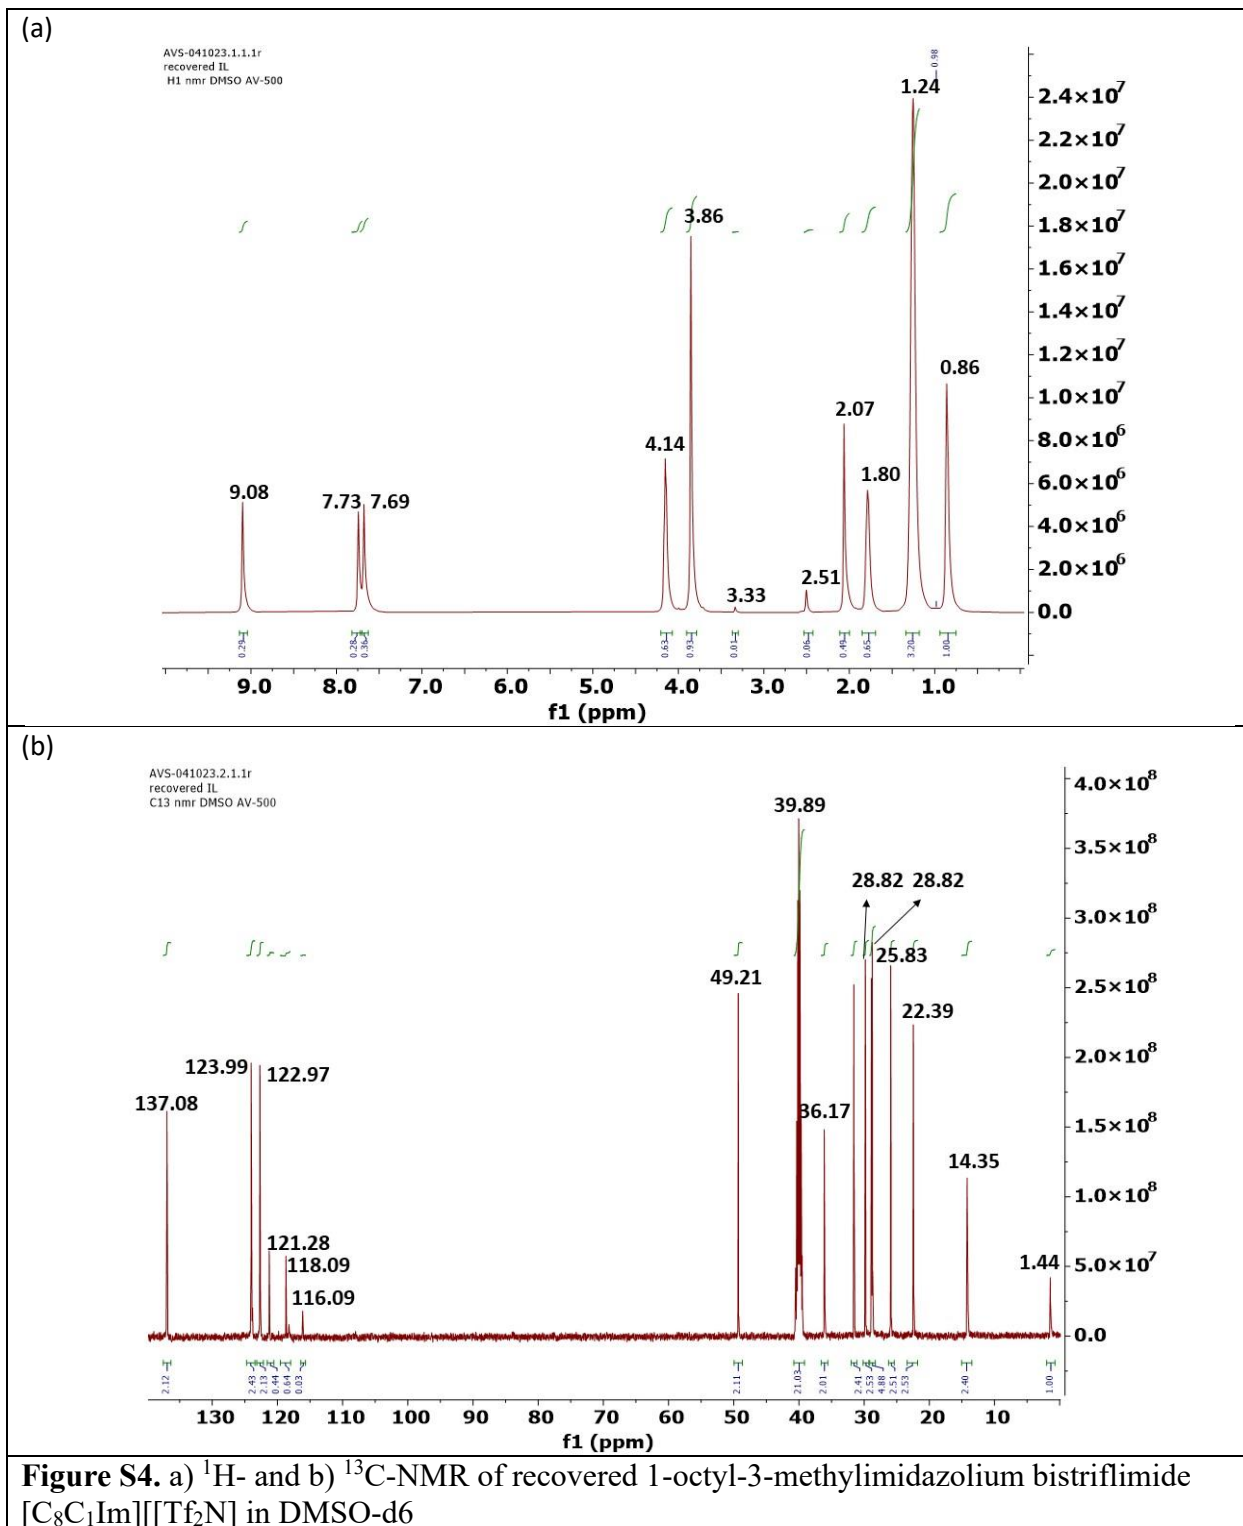

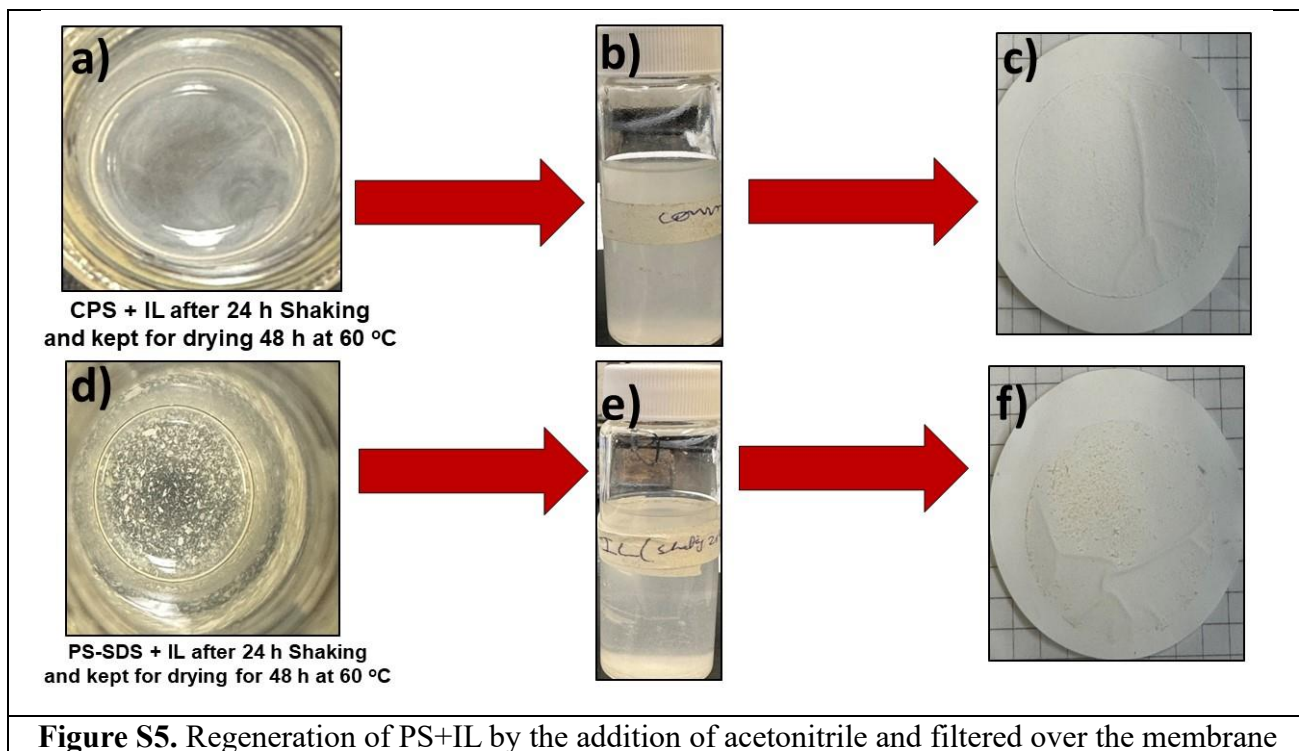

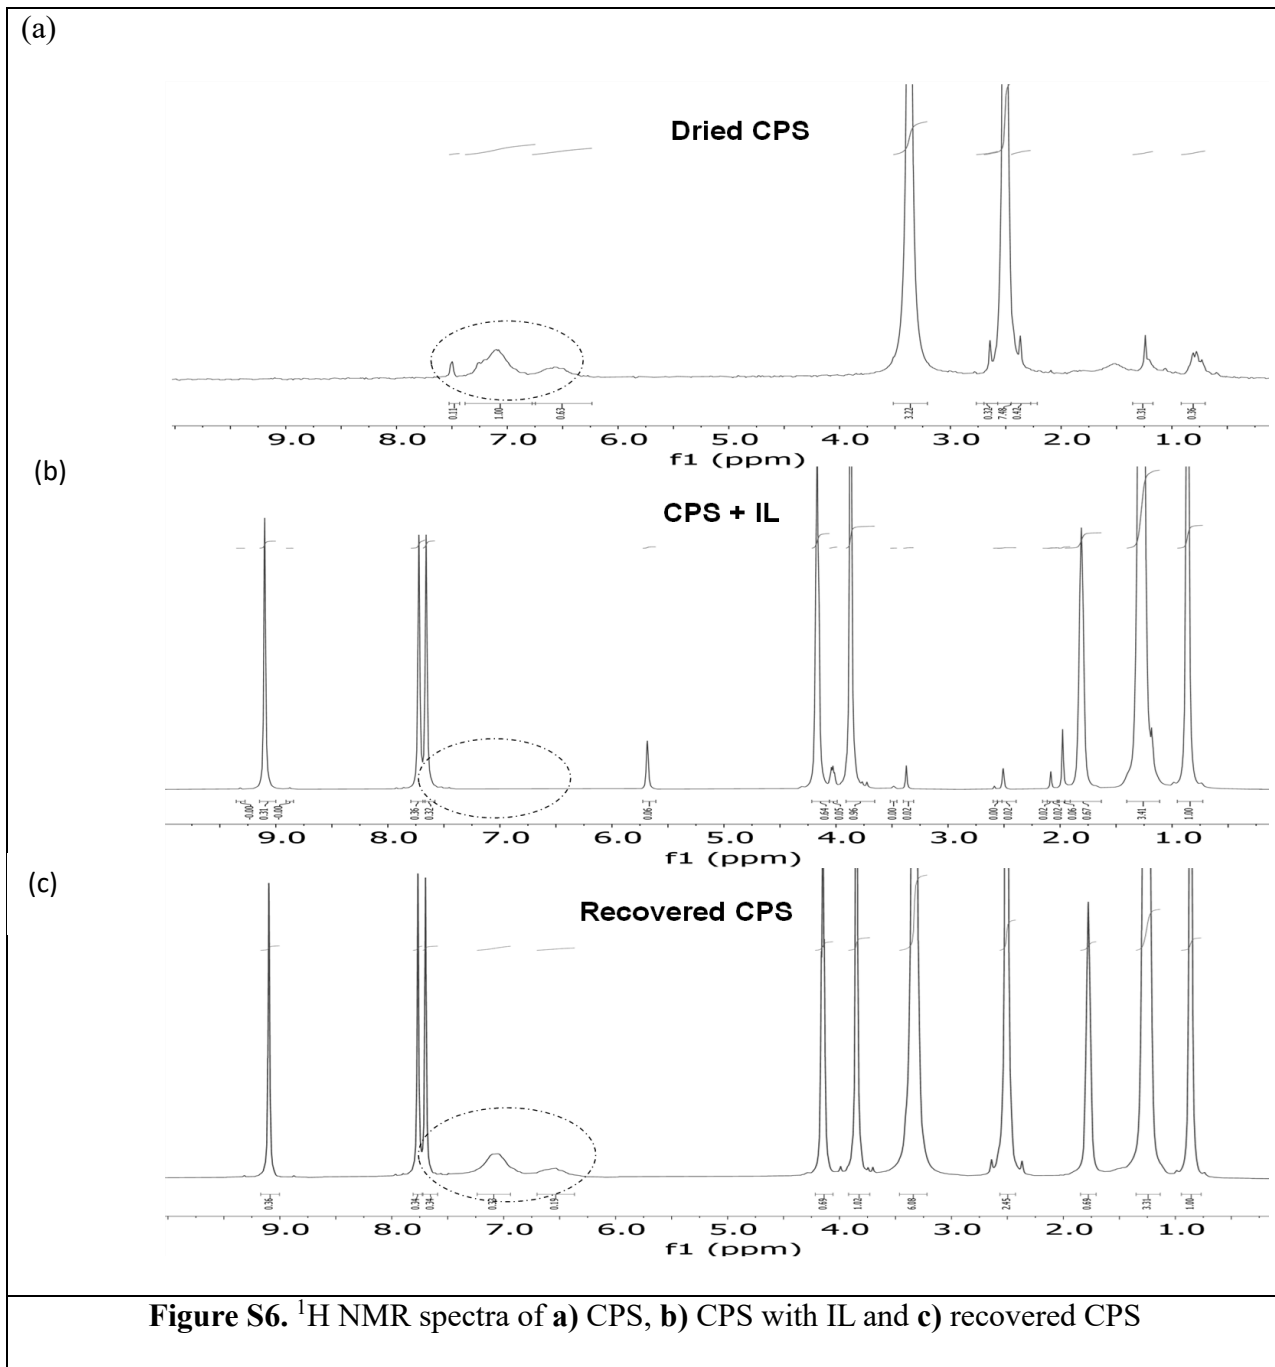

Supplement: d4ew00909f1.pdf [file d4ew00909f1.pdf]
